# Supplementary material
Source: bioRxiv or medRxiv preprint supplement (https://www.biorxiv.org/highwire/filestream/137391/field_highwire_adjunct_files/0/361105-1.pdf)
Supplement: Supplementary file [file 361105-1.pdf]

## Body/Overlap Zone/Ventral Groove

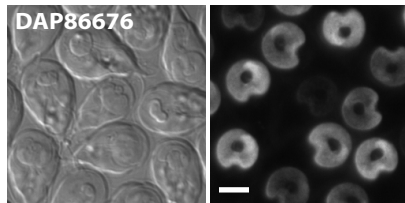

delta-giardin (SF assemblin)

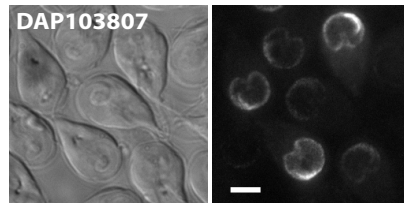

ankyrin repeat

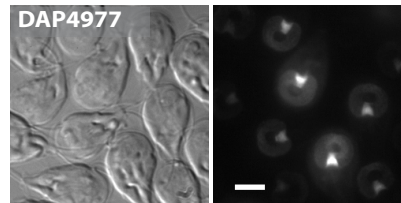

Nek kinase

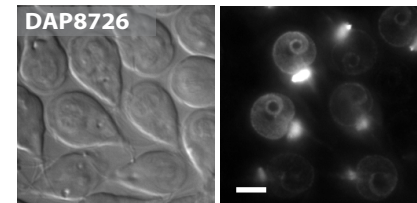

novel

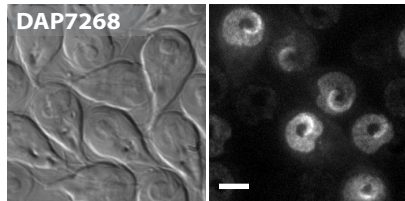

ankyrin repeat

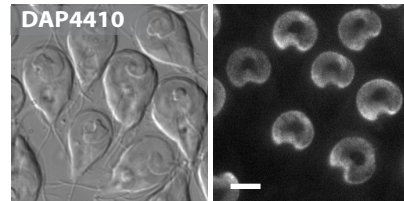

SALP-1 (SF assemblin)

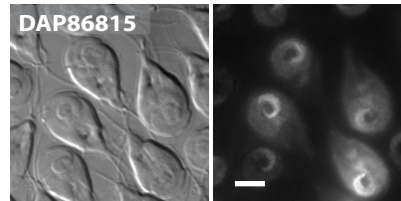

novel

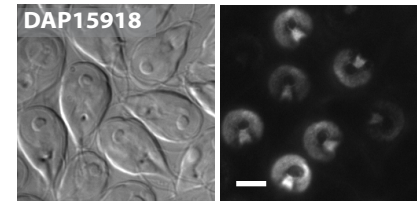

novel

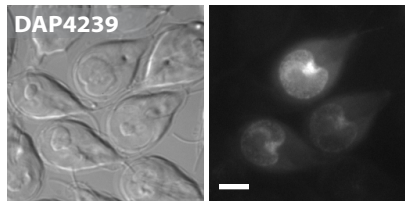

novel

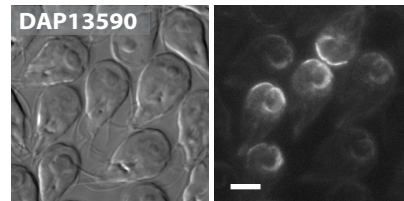

ankyrin repeat

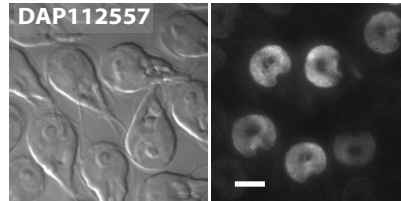

ankyrin repeat

## Body

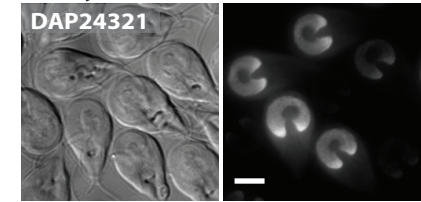

Nek kinase

## Body/Overlap Zone

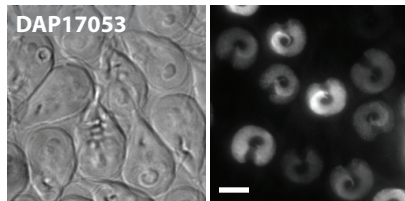

ankyrin repeat

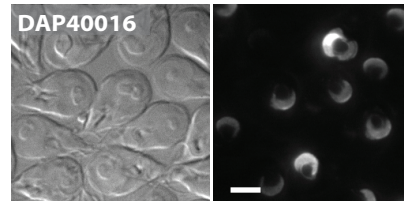

ankyrin repeat

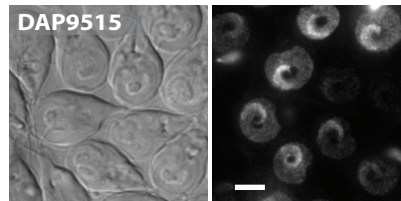

ankyrin repeat

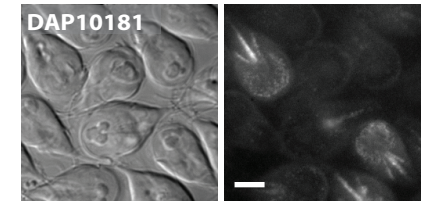

novel

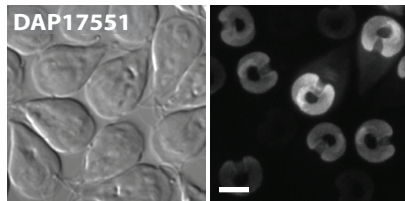

ankyrin repeat

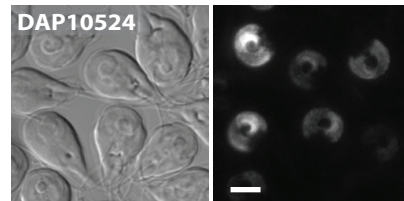

novel

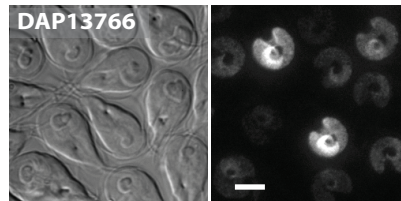

ankyrin repeat

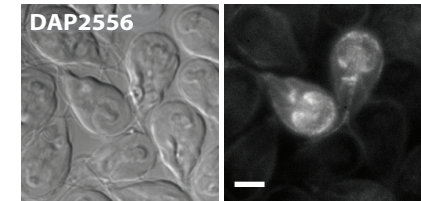

novel

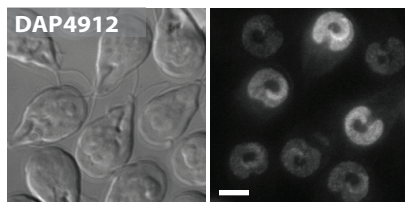

Nek kinase

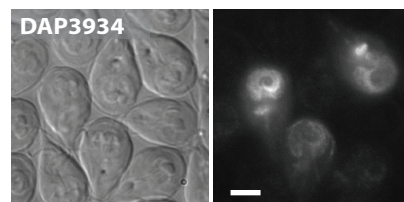

novel

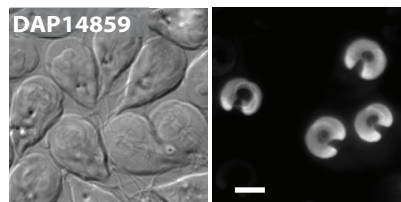

ankyrin repeat

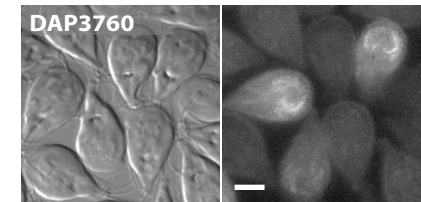

ankyrin repeat
